35

36 **Abstract**

37 Microgreens are rich functional crops with valuable nutritional elements that have health benefits  
38 when used as food supplants. Growth characterization, nutritional composition profile of 21  
39 varieties representing 5 species of the *Brassica* genus as microgreens were assessed under light-  
40 emitting diodes (LEDs) conditions. Microgreens were grown under four different LEDs ratios (%)  
41 ( $R_{80}:B_{20}$ ,  $R_{20}:B_{80}$ ,  $R_{70}:G_{10}:B_{20}$ , and  $R_{20}:G_{10}:B_{70}$ ). Results indicated that supplemental lighting with  
42 green LEDs ( $R_{70}:G_{10}:B_{20}$ ) enhanced vegetative growth and morphology, while blue LEDs ( $R_{20}:B_{80}$ )  
43 increased the mineral composition and vitamins content. Interestingly, combining the nutritional  
44 content with the growth yield to define the optimal LEDs setup, we found that the best lighting to  
45 promote the microgreen growth was supplying the green LEDs combination ( $R_{70}:G_{10}:B_{20}$ ).  
46 Remarkably, under this proper conditions, Kohlrabi purple, Cabbage red, Broccoli, Kale Tucsan,  
47 Komatsuna red, Tatsoi, and Cabbage green had the highest growth and nutritional content profile as  
48 microgreens which being a health-promoting in a diet support strategy required for the human  
49 health under certain isolated of limited food conditions.

50

51 **Keywords:** Brassicaceae; Functional Crops; Light Emitting Diodes; Microgreens; Nutritional  
52 quality

53

54

55

56

57

## 58 **1. Introduction**

59 As the world's population is rapidly growing, with an increasing demand for sustainable sources of  
60 food products such as the rich-nutrient functional crops. Ongoing efforts are aimed to find new  
61 strategies for food production to meet the demands of the growing world population. Recently, the  
62 consumption of microgreens has increased, as a rich-nutrient crop with a high level of nutrition  
63 components concentration contains; vitamins, minerals, and antioxidants compared to mature  
64 greens, which are helpful in filling the nutritional gap challenges [1]. Furthermore, microgreens  
65 being valuable functional crops for their rich-phytonutrients content [2, 3]. Microgreens are a  
66 category of edible salad crops that appearing in many upscale markets and restaurants. They are  
67 harvested at the base of the hypocotyl when the first true leaves start to emerge, generally, the  
68 growth rate is  $\leq 21$  days after sowing [4, 5]. Despite their small size, they can provide a high  
69 concentration of health-promoting phytochemicals [5]. Commercially greenhouse growers became  
70 more interested in the microgreen for their high market levels [4]. Specifically, microgreens of the  
71 family *Brassicaceae* have become a popular choice due to its easy way for germination and short  
72 growth length and providing wide flavors and colors [5]. Brassicaceae microgreens species could be  
73 used as a new ingredient which provides a wide variety of our food [5-7] and valued for containing  
74 significant amounts of cancer-fighting glucosinolates [8]. They are also rich in carotenoids,  
75 especially lutein, zeaxanthin, and  $\beta$ -carotene [9-11]. Thus, brassica microgreens are considered as a  
76 functional food, which serves as a health-promoting or disease preventing supplementals [5, 12]

77 Several strategies were used and developed for providing optimal greenhouse conditions to increase  
78 the microgreen yield. Light emitting diodes (LEDs) is a new light source technology used for  
79 greenhouses facilities and space- limited plant growth chambers [13, 14]. It becomes more  
80 economically viable with high efficiency and low cost, as well as the ability to select light qualities

81 and intensities [15]. It is reported that crop plants use light for photosynthesis and being responded  
82 to the different light intensity, wavelength [16, 17]. Microgreens have a lower demand for photon  
83 flux compared to long-cycle crops, thus are ideally adapted to chamber environments. Recently,  
84 many studies demonstrated the influence of LEDs (blue or/and red) lighting on the plant vegetative  
85 parameters [14, 18, 19] and demonstrated the effect of light quality on the growth of the cultivated  
86 plants [8, 20-22]. Nevertheless, a lack of information regarding the combined effect of red and blue  
87 and other LEDs lighting such as green light on the plant growth, morphology, and nutrition content  
88 profile of microgreens [22, 23]. Furthermore, green light supplies enhance the carotenoid content in  
89 mustard microgreens [24].

90 Although microgreens have been considered as valuable and nutritionally beneficial functional  
91 crops, a little is known on the integrity of individual and combined influence of green, red, and blue  
92 LEDs on Brassica species microgreens growth and nutritional composition. Therefore, the main  
93 purpose of this current study is to define the influence of alternative LEDs light regimens on  
94 Brassica species microgreens growth, and nutritional composition and to define which species could  
95 serve well as a life support component in many cases. We explore the impact of different four LEDs  
96 lighting ratio (Red, Blue, and Green) on 21 Brassica microgreens growth and nutritional profile.

97

## 98 **2. Material and Methods**

### 99 **2.1.Plant Materials and Growth chamber environment**

100 Twenty-one varieties of microgreens representing 5 species of Brassica genus of the *Brassicaceae*  
101 family (Table 1) were grown in greenhouse chambers in a collaborated study between the Faculty  
102 of Agriculture in both Zagazig University and Cairo University. We used the recommended soil and  
103 fertilization properties as reported by [5]. About 10-25 g of seeds, varying based on the seed index  
104 of each variety, (Table 1) were sown in peat moss in Rockwool tray in a controlled conditions

105 greenhouse (3 trays per each variety for 3 replicates), cultivated under relative humidity (RH), and  
106 carbon dioxide (CO<sub>2</sub>) concentration of 70%, and 500  $\mu\text{mol}\cdot\text{mol}^{-1}$ , respectively. Each day, 100 ml of  
107 CaCl<sub>2</sub> solution was added to each tray to further stimulate seedling growth. Once cotyledons were  
108 fully reflexed 5 d after sowing, 300 ml of 25% nutrient solution was added to each tray daily until  
109 harvest. This experiment was carried out simultaneously in the summer season of 2018 from May to  
110 September with as a growth length for each species ranging from 6-12 days (Table 1).

111

## 112 **2.2.LEDs lighting treatments**

113 Brassica microgreen plants were grown under LEDs lighting (Light-emitting diode arrays) were  
114 provided by four different light quality ratios (%) treatments of red:blue 80:20 and 20:80 (R<sub>80</sub>:B<sub>20</sub>,  
115 and R<sub>20</sub>:B<sub>80</sub>), or red:green:blue 70:10:20, and 20:10:70 (R<sub>70</sub>:G<sub>10</sub>:B<sub>20</sub>, and R<sub>20</sub>:G<sub>10</sub>:B<sub>70</sub>) (Philips  
116 GreenPower LED production modules; Koninklijke Philips Electronics, N. V., Amsterdam, The  
117 Netherlands), using 0.5 W per LED chip. Each LEDs treatment was carried out in a different room.  
118 In the controlled environment greenhouse, the LEDs were placed horizontally, above the bench top,  
119 at a height of 50 cm. we adjusted the photosynthetic photon flux density (PPFD) average to 150  
120  $\mu\text{mol}\cdot\text{m}^{-2}\cdot\text{s}^{-1}$  that was provided by the fluorescent lamps and bar-type LEDs. This experiment was  
121 performed three times replications with the same conditions.

## 122 **2.3.Harvest, Growth measurements**

123 Microgreen samples were harvested after the growth length for each species (Table1) without seed  
124 coats or roots as recommended by [5]. Each replicate used for the measurements consisted of at  
125 least 10 grown seedlings. Ten seedlings of each microgreen variety were randomly selected and  
126 measured to determine Hypocotyl Length (HL), Leaf Area (LA), for each LEDs treatment.  
127 Hypocotyl measurements HL of the harvested seedlings were measured from the tip where the  
128 cotyledons split, to the end of the base of the hypocotyl. LA of cotyledons and fully expanded

129 leaves were measured by LA meter (LI-3100; LI-COR Inc. Lincoln, NE) by recording the average  
130 of five scans.

131 Furthermore, another ten randomly selected seedlings for each variety used to assess both, Fresh  
132 weight (FW), and Dry weight percentage (DW%). After FW data were measured, samples were  
133 oven dried at 80°C for 72 hours. Then DW data were measured. FW and DW values were used to  
134 calculate DW% ( $DW\% = (DW/FW \times 100)$ ).

135

## 136 **2.4.Elemental Analysis**

137 Fresh microgreens (50 g FW per each sample) were collected and rinsed 3X using H<sub>2</sub>O to  
138 remove any surface residue. Dried microgreens (2 g per replicate) were grounded into a fine  
139 powder to analysis the elemental composition. , Each of the 21 samples was subjected to acid  
140 digestion procedures and quantitative measurements of the following elements: P, K, Ca, Na, Fe,  
141 Mn, Cu, and Zn were done using inductively coupled plasma optical emission spectrometry (ICP-  
142 OES) following the methods of Huang and Schulte [25]. To assure the accuracy of the method,  
143 standard reference materials (Apple leaves, NIST® SRM® 1515, NIST1515, SIGMA, USA, and  
144 Spinach leaves, NIST® SRM® 1570a, NIST1570A) were used and evaluated using the same  
145 digested procedure. For each ICP-OES analyte, the limit of detection (LOD) and limit of  
146 quantification (LOQ), which are a function of the sample mass were determined (Supplementary  
147 Table 1)

148

## 149 **2.5.Vitamin and Carotenoid concentration analysis**

### 150 **2.5.1. Phylloquinone**

151 Phylloquinone was determined according to a previously reported method by [26]. Under dime  
152 light, 0.2 g of dried microgreens were homogenized in 10 mL of H<sub>2</sub>O and 0.4 mL of 200 µg/mL  
153 menaquinone used as an internal standard. The sample was supplied with 15 mL of 2-

154 propanol/hexane (3:2 v/v) and were vortexed for 1 min. Then the sample was centrifuged at 1500g  
155 at 21°C for 5 min. Then we transferred the upper layer (hexane) into a new glass tube and to dry  
156 using a stream of N<sub>2</sub>. The residues of the sample were dissolved using 4 mL of hexane. Then, to  
157 purify the extract, 1 mL of the dissolved extract was loaded onto preconditioned silica gel columns  
158 (4 mL of 3.5% ethyl ether in hexane, followed by 4 mL of 100% hexane). We used 2 mL of hexane  
159 to wash the columns. Phylloquinone was eluted with 8 mL of 3.5% ethyl ether in hexane and then  
160 evaporated at 40 °C under N<sub>2</sub> flow. Further, it is reconstituted in 2 mL of mobile phase (99%  
161 methanol and 1% 0.05 M sodium acetate buffer, pH = 3.0) and is filtered through a 0.22 µm nylon  
162 syringe filter (Millipore, Bedford, MA). To detect the phylloquinone, we used a photodiode array  
163 detector (DAD) (G1315C, Agilent, Santa Clara, CA) on Agilent 1200 series HPLC system and  
164 absorbance wavelength was 270 nm. 20 µL of the extract was injected into the HPLC and being run  
165 through a C18 column (201TP, 5 µm, 150 × 4.6 mm, Grace, Deerfield, IL) flowing at the rate of 1  
166 mL/ min. The phylloquinone content was measured according to the internal standard method based  
167 on peak areas.

168

### 169 **2.5.2. Carotenoids and Tocopherols**

170 To extract both carotenoids and tocopherols, we followed the procedure described by [27] and  
171 modified by Xiao et al. [5]. In 15 mL screw-cap glass vial, 0.05 g of dried fine powder was  
172 homogenized in 7.5 mL of 1% butylated hydroxytoluene in ethanol and 500 µL of 86.82 µM trans-  
173 βapo-8 carotenal as an internal standard was added. 180 µL of 80% KOH was supplied to the  
174 mixture and, the vials were capped and placed in a dry bat at 70 °C for 15 min. The vials were  
175 removed and being cooled on ice 4°C for 5 min. The mixture was transferred into 15 mL centrifuge  
176 tubes supplied with 3.0 mL of deionized water and 3.0 mL of hexane/toluene solution (10:8 v/v).  
177 The mixture was carefully vortexed for 1 min and then were centrifuged at 1000g for 5 min. After  
178 centrifugation, the upper organic layer was collected into an 8 mL glass culture tube and

179 immediately placed into a nitrogen evaporator set at 30 °C. on the other hand, the lower layer was  
180 extracted with 3.0 mL of hexane/toluene (10:8 v/v). this extraction process was repeated at least  
181 four times until the upper layer is colorless. After evaporation, the residue was diluted in 500 µL of  
182 mobile phase acetonitrile/ethanol (1:1 v/v), filtered into an HPLC amber vial using nylon filter (0.22  
183 µm, Millipore, Bedford, MA). Subsequently, 20 µL was inoculated for HPLC analysis. Carotenoid  
184 and tocopherol concentrations were measured using isocratic reverse-phase high-performance liquid  
185 chromatography (RP-HPLC). Absorbance was measured at 290 nm (for tocopherols) and 450 nm  
186 (for carotenoids).

187

### 188 **2.5.3. Ascorbic Acid**

189 Total ascorbic acid (TAA) was assessed spectrophotometrically according to [28]. 3g fresh  
190 microgreens were homogenization in 10 mL of ice-cold 5% metaphosphoric acid (w/v) at 4°C at  
191 15000 rpm for 1 min. The homogenized then centrifuged at 7000g for 20 min at 4°C. The  
192 supernatant was filtered through Whatman 4# filter paper. TAA was measured  
193 spectrophotometrically at 525 nm. Concentrations of TAA was calculated from an L-ascorbic acid  
194 standard curve.

195

### 196 **2.6. Clustering hierarchical analysis**

197 In order to extrapolate the similarities and the dissimilarities among the 21 microgreens in growth  
198 and nutritional assessment, hierarchical cluster analysis was performed using the normalized data  
199 set using *class Orange clustering hierarchical* using *ORANGE version 3.7* [29].

200

### 201 **2.7. Statistical analysis**

202 The experiment was laid out in a randomized block design in a factorial arrangement with LEDs  
203 (four levels) and Microgreens (Twenty-one varieties) for three different biological replicates. Data



204 were collected and analyzed according to [30]. SPSS<sub>v.22</sub> software was used to analyze the variance  
205 of differences using ANOVA test statistically followed by LSD analysis. The degree of freedom  
206 was followed as  $P \leq 0.05$ ,  $P \leq 0.01$ , and  $P \leq 0.001$  considers the statistical significance and represents  
207 as \*, \*\*, \*\*\* respectively.

208

### 209 **3. Results.**

#### 210 **3.1. The influence of LEDs on microgreens growth, nutritional profile**

211 In the present work, four different LEDs lighting ratio (%) treatments of R<sub>80</sub>:B<sub>20</sub>, R<sub>20</sub>:B<sub>80</sub>,  
212 R<sub>70</sub>:G<sub>10</sub>:B<sub>20</sub>, and R<sub>20</sub>:G<sub>10</sub>:B<sub>70</sub> were implemented. Growth parameters of the 21 varieties were  
213 analyzed (Fig. 1). Results revealed that those microgreens are grown under the R<sub>70</sub>:G<sub>10</sub>:B<sub>20</sub> had the  
214 highest growth and morphology targeted parameter, while the lowest growth parameters were  
215 observed under R<sub>20</sub>:B<sub>80</sub> (Figure 1). The Hypocotyl length (HL) and leaf area (LA) of the  
216 microgreens were significantly elongated in plants grown under R<sub>70</sub>:G<sub>10</sub>:B<sub>20</sub> compared to those  
217 grown under R<sub>80</sub>:B<sub>20</sub>, R<sub>20</sub>:B<sub>80</sub>, and R<sub>20</sub>:G<sub>10</sub>:B<sub>70</sub>, respectively (Figure1)., Fresh weight (FW) and Dry  
218 weight % (DW%) of those microgreens grown under R<sub>70</sub>:G<sub>10</sub>:B<sub>20</sub> treatment showed the highest  
219 values; on average; 0.4g (FW), and 6.27 % (DW%). Indicating that R<sub>70</sub>:G<sub>10</sub>:B<sub>20</sub> combination induces  
220 an increase in all studied growth and morphology parameters in comparison with the other LEDs  
221 lighting treatments (Figure1).

222 Considering that R<sub>70</sub>:G<sub>10</sub>:B<sub>20</sub> LEDs lighting combination has an impact in targeted growth  
223 parameters, we investigated whether it has a functional influence on the nutritional composition  
224 profile by conducting an ICP analysis of macro and microelements from 21 varieties Brassicaceae  
225 microgreen using lowest growth enhancer combination as internal references. Unexpectedly,  
226 relative macro and microelements content were showed a dramatic decreased compared to R<sub>20</sub>:B<sub>80</sub>  
227 and the other LEDs ratios (Figure 2 and 3). While the highest levels were obtained in microgreens

228 were growing under R<sub>20</sub>:B<sub>80</sub> combination. However, the analysis also did not take the yield into  
229 consideration.

230

231 Considering the influence of LEDs lighting combination on the microgreen's growth together with  
232 nutrition components value, we analyzed deeper the vitamin and carotenoid contents. Agreeing with  
233 our previous result obtained in the macro- and microelements, we found that the contents of  
234 Phylloquinone,  $\alpha$ -tocopherol, Total Ascorbic Acid (TAA), and  $\beta$ -carotene of 21 varieties of  
235 Brassica microgreens grown under red: blue 80:20 (R<sub>80</sub>:B<sub>20</sub>), were significantly increased compared  
236 to other combination respectively (Figure 4).

237

### 238 **3.2. Conclude the optimum LEDs conditions for Brassica microgreens growth conditions**

239 Our previous data showed that LEDs lighting combination has an impact on all growth and  
240 nutritional parameters. More precisely. We found that Brassica microgreen varieties were grown  
241 under the LEDs lighting of R<sub>70</sub>:G<sub>10</sub>:B<sub>20</sub> combination enhances the Hypocotyl length, leaf area, fresh  
242 weight, and dry weight compared to other LEDs combination. While minerals (macro and  
243 microelements) and vitamins were significantly increased corresponding to plants grown under  
244 R<sub>80</sub>:B<sub>20</sub>. Attempts to detect the best LEDs combination taking into consideration the actual yield of  
245 microgreens, we conducted a correlation analysis with the yield. We estimated the minerals and  
246 vitamins concentrations corresponding to the actual fresh weight yielded (Figure 5 and 6).  
247 Interestingly, we found that mineral compositions and vitamins content in the yielded fresh weight  
248 were significantly increased in the microgreen varieties grown under the LEDs lighting of  
249 R<sub>70</sub>:G<sub>10</sub>:B<sub>20</sub> combination compared to other combination (Figure 5 and 6).

250

### 251 **3.3. Hierarchical cluster analysis of 21 varieties of Brassica microgreens**

252 A hierarchical cluster analysis profiled growth, mineral compositions and vitamins content of 21  
253 microgreens varieties grown under R<sub>70</sub>:G<sub>10</sub>:B<sub>20</sub> family has been performed using *class Orange*  
254 *clustering hierarchical* using *ORANGE version 3.7* [29]. Presented data of microgreens grown  
255 under R<sub>70</sub>:G<sub>10</sub>:B<sub>20</sub>, which present the highest values of growth and nutritional profile are shown in  
256 Figure 7 and Table 2. We utilized the hierarchical analysis methods (average-linkage distance  
257 between two clusters) to evaluate whether these trends were consistent across the 21 varieties under  
258 study. The hierarchical cluster analysis shows that the 21 microgreens are classified into five  
259 groups. Among the five groups, the highest distance group (Figure 7, cluster group in yellow color  
260 + Kale Tucsan in green cluster) contained 7 microgreens (Kohlrabi purple, Cabbage red, Broccoli,  
261 Kale Tucsan, Komatsuna red, Tatsoi, Cabbage green) which are representing 3 species (*B. oleracea*,  
262 *B. rapa*, *B. narinosa*).

263

#### 264 **4. Discussion**

265 Due to the increased interest with providing the controlled environment greenhouses with LEDs  
266 lighting and for increasing the microgreen growth and nutritional profile, we investigated the impact  
267 of four different LEDs lighting ratios on the growth and nutritional quality assessment of 21  
268 varieties belong to Brassica genera of the family Brassicaceae grew as microgreens. Microgreens  
269 are reported in many studies as valuable source vitamins, phenolics and mineral compositions [31].  
270 Enhancing their nutritional qualities and growth is an exciting avenue of research and agriculture  
271 biotechnology.

272 In our study, we reveal various effects on the combination ratios between blue LEDs, red and green  
273 LEDs. A plant grown under a monochromatic light beam also stimulate specific photoreceptors that  
274 are involved in numerous biological processes. Enhance the nutritional profile and plant growth was  
275 demonstrated in many species, such as rice [32], Brassica spp. [5, 17, 22], etc. It has been reported

276 that red and blue light are important for the expansion of the hypocotyl elongation, pigments  
277 accumulation, and enhancement of biomass [33]. In contrast, exposure to green LEDs increases  
278 biomass at a high intensity [34]. We notice that growing microgreens under R<sub>70</sub>:G<sub>10</sub>:B<sub>20</sub> shows the  
279 highest value of the vegetative parameters, taking in our consideration the yield produced under all  
280 combination treatments (Figure 1). These results provide a clear indication that blue LEDs in  
281 combination with red LEDs and high-intensity green LEDs are more efficient for plants microgreen  
282 growth. Providing green lighting within the growing conditions enhance Brassica microgreens  
283 growth, while, increasing the blue light ratio had a passive response to the growth.

284 Many reports demonstrate the positive influence of the red:blue lighting plant growth and  
285 photosynthesis [13, 16, 17, 21, 24, 35, 36]. Furthermore, a red, blue, and green light combination  
286 has an effective source for photosynthesis [37].

287 Consequently, supply the red and blue LEDs combination with a green light has a significant impact  
288 on lettuce leaves growth and photosynthetic rate compared with the red and blue LEDs only. [38,  
289 39]. It appears that blue and red light enhances the anthocyanins accumulation in leaves and become  
290 black, while green light stimulates phytochrome, shifting the active pool of Type I and Type II  
291 phytochromes to include reverse accumulation of anthocyanins [40].

292 Consequently, we demonstrate the positive influence of providing green light improving  
293 microgreens growth and morphology. It is reported that HL and LA of kohlrabi, mizuna, and  
294 mustard were increased when grown under green light R<sub>74</sub>:G<sub>18</sub>:B<sub>8</sub> compared with the R<sub>87</sub>:B<sub>13</sub>, while  
295 FW and DW were greater of those microgreens grown under providing green light than blue/red  
296 [41]. Moreover, FW of broccoli microgreens grown under light ratios of R<sub>85</sub>:G<sub>10</sub>:B<sub>5</sub> and R<sub>80</sub>:B<sub>20</sub>  
297 were significantly increased than under R<sub>70</sub>:G<sub>10</sub>:B<sub>20</sub> [42]. The same influence is observed on  
298 chlorophyll content which improved significantly of the plant grown under additional green light  
299 [22, 41] Furthermore, the reduction on the growth parameters due to the increased of blue lighting

300 was reported. It is found that the hypocotyl elongation of kohrabi, mizuna, mustard was decreased  
301 under the red:blue light combination due to the inhibition of the gibberellins (GA), which inhibit the  
302 hypocotyl elongation [36].

303 Growing microgreens plants under blue LEDs R<sub>20</sub>:B<sub>80</sub> in our study enhance the minerals  
304 composition and the vitamin content accompanied with the less growth yield compared with the  
305 green LEDs R<sub>70</sub>:G<sub>10</sub>:B<sub>20</sub>. It is reported that broccoli microgreens grown under blue light (R<sub>0</sub>:B<sub>100</sub>)  
306 produce higher nutrient-dense microgreens [8, 42]. Blue light could be shown as a dominant means  
307 of regulating the nutrient content synthesis such as proton pumping, ion channel, activities, and  
308 membrane permeability [41, 42].

309 Comparing the LEDs lighting ratios to conclude the proper conditions, we accompanied the  
310 nutritional profile with the actual growth yielding. We found that green LEDs R<sub>70</sub>:G<sub>10</sub>:B<sub>20</sub> has the  
311 proper yielded influence and produced final higher mineral concentration and vitamin content due  
312 to the high growth yield. Despite the blue LED treatment to increase the mineral and vitamin  
313 content, but it is accompanied by less growth yield.

314 In conclusion, the assessment of 21 brassica microgreens growth and nutritional profile grown  
315 under LEDs technology provides a satisfactory growing conditions examination of microgreens.  
316 Providing green lighting ratio of R<sub>70</sub>:G<sub>10</sub>:B<sub>20</sub> show a positive influence on the growing microgreens  
317 growth and morphology. Interestingly, Kohlrabi purple, Cabbage red, Broccoli, Kale Tucsan,  
318 Komatsuna red, Tatsoi, Cabbage green are presented as the top microgreen's candidates of our  
319 study assessment that serve as a life support component in limited space-based conditions and  
320 controlled environment greenhouse.

321

322 **Acknowledgments**

323 Special thanks to DAAD and Exceed Swindon to provide this opportunity to present this work in  
324 the EXCEED SWINDON EXPERT WORKSHOP (Aswan-EGYPT 2018). Furthermore, Many  
325 thanks to all the lab member in the Agronomy Department, faculty of agriculture, Zagazig  
326 university for their technical support.

327

328 **Author contributions.** K.Y.K., A.A.N conceived and designed the experiments. K.Y.K., A.A.E,  
329 A.A.N, M.A.S.A. and S. J. L.Z. performed the experiment. K.Y.K., D.A.M., A.A.S, N.Q., S.M.A  
330 and S.Y.M analyzed the data. K.Y.K., A.A.N. wrote the manuscript. R.H., M.A.E. contributed to  
331 the manuscript writing and revision. All authors revised the manuscript.

332 **Competing interests.** The authors declare no competing financial and/or non-financial interests in  
333 relation to the work described.

334 **Funding.** This research work is a part of a project received seed funding from the Dubai Future  
335 Foundation through Gaaana.com open research platform (Grant no. MBR026).

336

337

338

339

340

341

342

343

344

345

References

- 346 [1] B. Burlingame, Grand challenges in nutrition and environmental sustainability, *Frontiers in*  
347 *nutrition*, 1 (2014) 3-3.
- 348 [2] M.C. Kyriacou, Y. Roupael, F. Di Gioia, A. Kyratzis, F. Serio, M. Renna, S. De Pascale, P.  
349 Santamaria, Micro-scale vegetable production and the rise of microgreens, *Trends in Food Science*  
350 *& Technology*, 57 (2016) 103-115.
- 351 [3] R. Bulgari, A. Baldi, A. Ferrante, A. Lenzi, Yield and quality of basil, Swiss chard, and rocket  
352 microgreens grown in a hydroponic system, *New Zealand Journal of Crop and Horticultural*  
353 *Science*, 45 (2017) 119-129.
- 354 [4] D.D. Treadwell, R. Hochmuth, L. Landrum, W. Laughlin, Microgreen: A new specialty crop,  
355 Univ. Florida IFAS, Ext. Bul. HS1164, (2010).
- 356 [5] Z. Xiao, G.E. Lester, Y. Luo, Q. Wang, Assessment of vitamin and carotenoid concentrations of  
357 emerging food products: edible microgreens, *J Agric Food Chem*, 60 (2012) 7644-7651.
- 358 [6] C. Murphy, W. Pill, Cultural practices to speed the growth of microgreen arugula (roquette;  
359 *Eruca vesicaria* subsp. *sativa*), *The Journal of Horticultural Science and Biotechnology*, 85 (2010)  
360 171-176.
- 361 [7] J.S. Lee, W.G. Pill, B.B. Cobb, M. Olszewski, Seed treatments to advance greenhouse  
362 establishment of beet and chard microgreens, *The Journal of Horticultural Science and*  
363 *Biotechnology*, 79 (2004) 565-570.
- 364 [8] D.A. Kopsell, C.E. Sams, Increases in Shoot Tissue Pigments, Glucosinolates, and Mineral  
365 Elements in Sprouting Broccoli after Exposure to Short-duration Blue Light from Light Emitting  
366 Diodes, *Journal of the American Society for Horticultural Science*, 138 (2013) 31-37.
- 367 [9] M. Björkman, I. Klingen, A.N.E. Birch, A.M. Bones, T.J.A. Bruce, T.J. Johansen, R. Meadow,  
368 J. Mølmann, R. Seljåsen, L.E. Smart, D. Stewart, Phytochemicals of Brassicaceae in plant  
369 protection and human health – Influences of climate, environment and agronomic practice,  
370 *Phytochemistry*, 72 (2011) 538-556.
- 371 [10] M. Lefsrud, D. Kopsell, A. Wenzel, J. Sheehan, Changes in kale (*Brassica oleracea* L. var.  
372 *acephala*) carotenoid and chlorophyll pigment concentrations during leaf ontogeny, *Scientia*  
373 *Horticulturae*, 112 (2007) 136-141.
- 374 [11] S.D. Carvalho, K.M. Folta, Environmentally Modified Organisms – Expanding Genetic  
375 Potential with Light, *Critical Reviews in Plant Sciences*, 33 (2014) 486-508.
- 376 [12] L. Kou, Y. Luo, T. Yang, Z. Xiao, E.R. Turner, G.E. Lester, Q. Wang, M.J. Camp, Postharvest  
377 biology, quality and shelf life of buckwheat microgreens, *LWT - Food Science and Technology*, 51  
378 (2013) 73-78.
- 379 [13] A. Yano, K. Fujiwara, Plant lighting system with five wavelength-band light-emitting diodes  
380 providing photon flux density and mixing ratio control, *Plant methods*, 8 (2012) 46.
- 381 [14] N.C. Yorio, G.D. Goins, H.R. Kagie, R.M. Wheeler, J.C. Sager, Improving spinach, radish,  
382 and lettuce growth under red light-emitting diodes (LEDs) with blue light supplementation,  
383 *HortScience*, 36 (2001) 380-383.
- 384 [15] E. Goto, Plant production in a closed plant factory with artificial lighting, *Acta Hort.*, 956  
385 (2012) 37-49.
- 386 [16] C. Dong, Y. Fu, G. Liu, H. Liu, Low light intensity effects on the growth, photosynthetic  
387 characteristics, antioxidant capacity, yield and quality of wheat (*Triticum aestivum* L.) at different  
388 growth stages in BLSS, *Advances in Space Research*, 53 (2014) 1557-1566.
- 389 [17] G. Samuolienė, A. Brazaitytė, J. Jankauskienė, A. Viršilė, R. Sirtautas, A. Novičkovas, S.  
390 Sakalauskienė, J. Sakalauskaitė, P. Duchovskis, LED irradiance level affects growth and nutritional  
391 quality of Brassica microgreens, *Central European Journal of Biology*, 8 (2013) 1241-1249.
- 392 [18] R. Matsuda, K. Ohashi-Kaneko, K. Fujiwara, E. Goto, K. Kurata, Photosynthetic  
393 characteristics of rice leaves grown under red light with or without supplemental blue light, *Plant &*  
394 *cell physiology*, 45 (2004) 1870-1874.



- 395 [19] R. Matsuda, K. Ohashi-Kaneko, K. Fujiwara, K. Kurata, Effects of blue light deficiency on  
396 acclimation of light energy partitioning in PSII and CO<sub>2</sub> assimilation capacity to high irradiance in  
397 spinach leaves, *Plant & cell physiology*, 49 (2008) 664-670.
- 398 [20] G.W. Stutte, S. Edney, T. Skerritt, Photoregulation of Bioprotectant Content of Red Leaf  
399 Lettuce with Light-emitting Diodes, *HortScience*, 44 (2009) 79-82.
- 400 [21] I. Tarakanov, O. Yakovleva, I. Konovalova, G. Paliutina, A. Anisimov, Light-Emitting Diodes:  
401 on the way to combinatorial lighting technologies for basic research and crop production,  
402 *International Society for Horticultural Science (ISHS)*, Leuven, Belgium, 2012, pp. 171-178.
- 403 [22] G. Samuolienė, A. Brazaitytė, R. Sirtautas, A. Viršilė, J. Sakalauskaitė, S. Sakalauskienė, P.  
404 Duchovskis, LED illumination affects bioactive compounds in romaine baby leaf lettuce, *Journal of*  
405 *the Science of Food and Agriculture*, 93 (2013) 3286-3291.
- 406 [23] T. Ouzounis, E. Rosenqvist, C.-O. Ottosen, Spectral Effects of Artificial Light on Plant  
407 Physiology and Secondary Metabolism: A Review, *HortScience*, 50 (2015) 1128-1135.
- 408 [24] A. Brazaitytė, S. Sakalauskienė, G. Samuolienė, J. Jankauskienė, A. Viršilė, A. Novičkovas, R.  
409 Sirtautas, J. Miliauskienė, V. Vaštakaitė, L. Dabašinskas, P. Duchovskis, The effects of LED  
410 illumination spectra and intensity on carotenoid content in Brassicaceae microgreens, *Food*  
411 *Chemistry*, 173 (2015) 600-606.
- 412 [25] C.Y.L. Huang, E.E. Schulte, Digestion of plant tissue for analysis by ICP emission  
413 spectroscopy, *Communications in Soil Science and Plant Analysis*, 16 (1985) 943-958.
- 414 [26] S.L. Booth, K.W. Davidson, J.A. Sadowski, Evaluation of an HPLC method for the  
415 determination of phylloquinone (vitamin K<sub>1</sub>) in various food matrixes, *Journal of Agricultural and*  
416 *Food Chemistry*, 42 (1994) 295-300.
- 417 [27] G.E. Lester, G.J. Hallman, J.A. Pérez,  $\gamma$ -Irradiation Dose: Effects on Baby-Leaf Spinach  
418 Ascorbic Acid, Carotenoids, Folate,  $\alpha$ -Tocopherol, and Phylloquinone Concentrations, *Journal of*  
419 *Agricultural and Food Chemistry*, 58 (2010) 4901-4906.
- 420 [28] D.M. Hodges, C.F. Forney, W.V. Wismer, Antioxidant Responses in Harvested Leaves of Two  
421 Cultivars of Spinach Differing in Senescence Rates, 126 (2001) 611.
- 422 [29] J. Demsar, T. Curk, A. Erjavec, C. Gorup, T. Hocevar, M. Milutinovic, M. Mozina, M.  
423 Polajnar, M. Toplak, A. Staric, M. Stajdohar, L. Umek, L. Zagar, J. Zbontar, M. Zitnik, B. Zupan,  
424 Orange: Data Mining Toolbox in Python, *Journal of Machine Learning Research*, 14 (2013) 2349-  
425 2353.
- 426 [30] R.G.D. Steel, J.H. Torrie, Principles and Procedures of Statistics. A Biometrical Approach, 2nd  
427 Ed. ed., MacGraw Hill Book Company, New York, 1980.
- 428 [31] S.A. Mir, M.A. Shah, M.M. Mir, Microgreens: Production, shelf life, and bioactive  
429 components, *Crit Rev Food Sci Nutr*, 57 (2017) 2730-2736.
- 430 [32] X.W. Chen, S.Q. Liu, Y. Wang, J.K. Liu, L. Feng, [Effects of different LED light qualities on  
431 growth, photosynthetic characteristics and nutritional quality of savoy], *Ying Yong Sheng Tai Xue*  
432 *Bao*, 25 (2014) 1955-1962.
- 433 [33] H. Li, Z. Xu, C. Tang, Effect of light-emitting diodes on growth and morphogenesis of upland  
434 cotton (*Gossypium hirsutum* L.) plantlets in vitro, *Plant Cell, Tissue and Organ Culture (PCTOC)*,  
435 103 (2010) 155-163.
- 436 [34] M. Johkan, K. Shoji, F. Goto, S.-n. Hashida, T. Yoshihara, Blue Light-emitting Diode Light  
437 Irradiation of Seedlings Improves Seedling Quality and Growth after Transplanting in Red Leaf  
438 Lettuce, 45 (2010) 1809.
- 439 [35] J.H. Kang, S. KrishnaKumar, S.L.S. Atulba, B.R. Jeong, S.J. Hwang, Light intensity and  
440 photoperiod influence the growth and development of hydroponically grown leaf lettuce in a  
441 closed-type plant factory system, *Horticulture, Environment, and Biotechnology*, 54 (2013) 501-  
442 509.
- 443 [36] T.I. Potter, S.B. Rood, K.P. Zanewich, Light intensity, gibberellin content and the resolution of  
444 shoot growth in Brassica, *Planta*, 207 (1999) 505-511.



- 445 [37] S. Muneer, E. Kim, J. Park, J. Lee, Influence of green, red and blue light emitting diodes on  
446 multiprotein complex proteins and photosynthetic activity under different light intensities in lettuce  
447 leaves (*Lactuca sativa* L.), *International journal of molecular sciences*, 15 (2014) 4657-4670.
- 448 [38] H.H. Kim, G.D. Goins, R.M. Wheeler, J.C. Sager, Green-light supplementation for enhanced  
449 lettuce growth under red- and blue-light-emitting diodes, *HortScience*, 39 (2004) 1617-1622.
- 450 [39] H.H. Kim, R.M. Wheeler, J.C. Sager, G.D. Gains, J.H. Naikane, EVALUATION OF  
451 LETTUCE GROWTH USING SUPPLEMENTAL GREEN LIGHT WITH RED AND BLUE  
452 LIGHT-EMITTING DIODES IN A CONTROLLED ENVIRONMENT - A REVIEW OF  
453 RESEARCH AT KENNEDY SPACE CENTER, *International Society for Horticultural Science*  
454 (ISHS), Leuven, Belgium, 2006, pp. 111-120.
- 455 [40] S.D. Carvalho, K.M. Folta, Green light control of anthocyanin production in microgreens,  
456 *International Society for Horticultural Science (ISHS)*, Leuven, Belgium, 2016, pp. 13-18.
- 457 [41] J.R. Gerovac, J.K. Craver, J.K. Boldt, R.G. Lopez, Light Intensity and Quality from Sole-  
458 source Light-emitting Diodes Impact Growth, Morphology, and Nutrient Content of Brassica  
459 Microgreens, *HortScience*, 51 (2016) 497-503.
- 460 [42] D.A. Kopsell, C.E. Sams, T.C. Barickman, R.C. Morrow, Sprouting Broccoli Accumulate  
461 Higher Concentrations of Nutritionally Important Metabolites under Narrow-band Light-emitting  
462 Diode Lighting, *Journal of the American Society for Horticultural Science*, 139 (2014) 469-477.

463

464

465

466

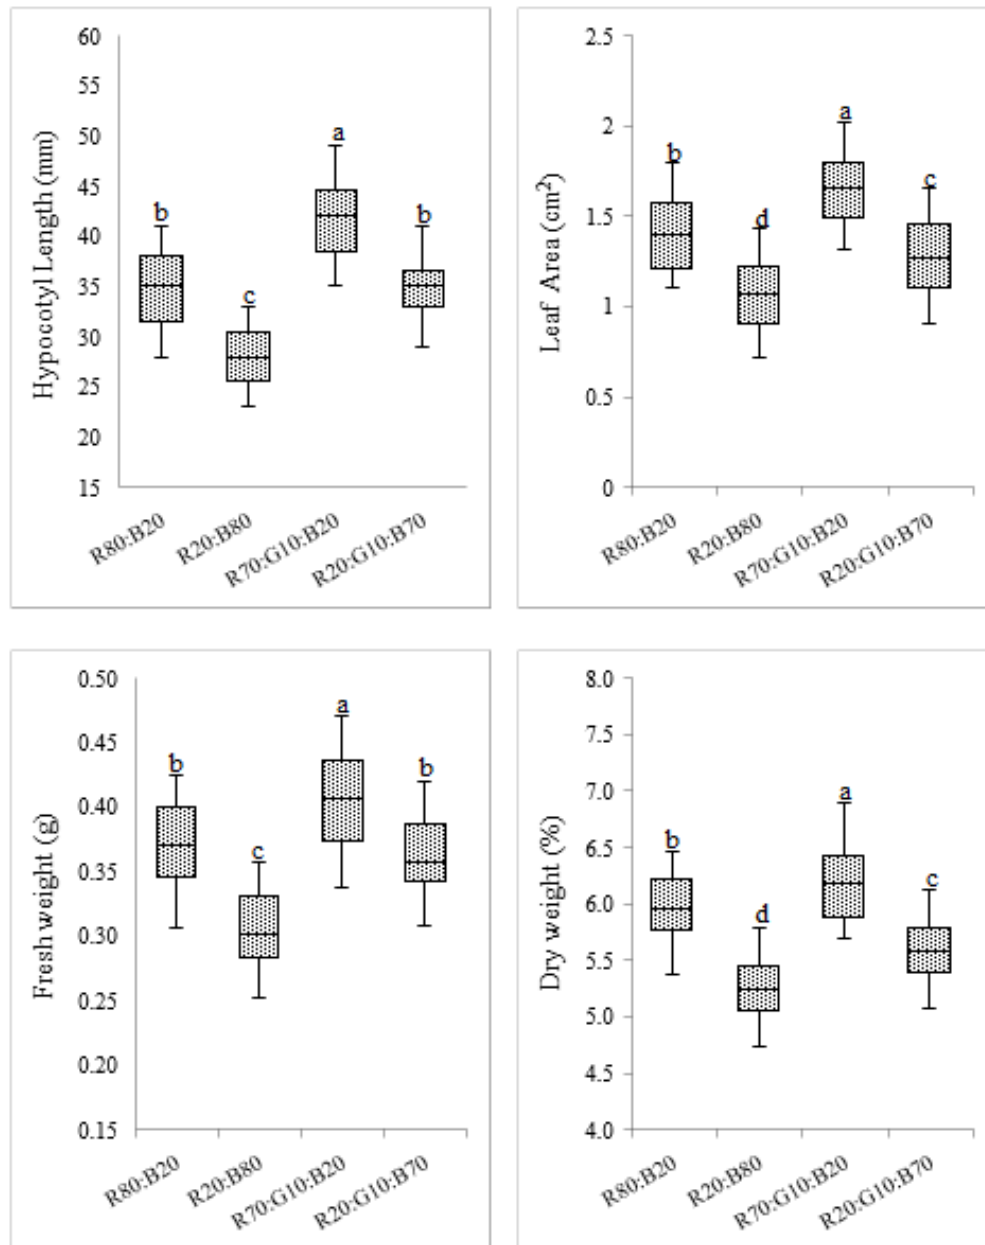

467

468

469 **Figure 1. Box plot of growth and morphological measurements of *Brassica* microgreens grown under LEDs**  
470 **treatments.** The plot illustrates the Mean and median of (Hypocotyl Length (mm), Leaf Area (cm<sup>2</sup>), Fresh weight (g),  
471 and Dry weight (%)) of 21 varieties of *Brassica* microgreens represented 5 species grown under different light-emitting  
472 diodes (LEDs) ratio (%) of red:blue 80:20 (R<sub>80</sub>:B<sub>20</sub>), red:blue 20:80 (R<sub>20</sub>:B<sub>80</sub>), red:green:blue 70:10:20 (R<sub>70</sub>:G<sub>10</sub>:B<sub>20</sub>), or  
473 red:green:blue 20:10:20 (R<sub>20</sub>:G<sub>10</sub>:B<sub>70</sub>) (Supplemental Table 2 and 3). Resulting ranking could be analyzed with point  
474 values of Mean and Median or uncertainty range with box. Statistical analysis is performed using a one-way ANOVA  
475 test (P ≤ 0.05). Small letters denote statistically significant differences.

476

477

478

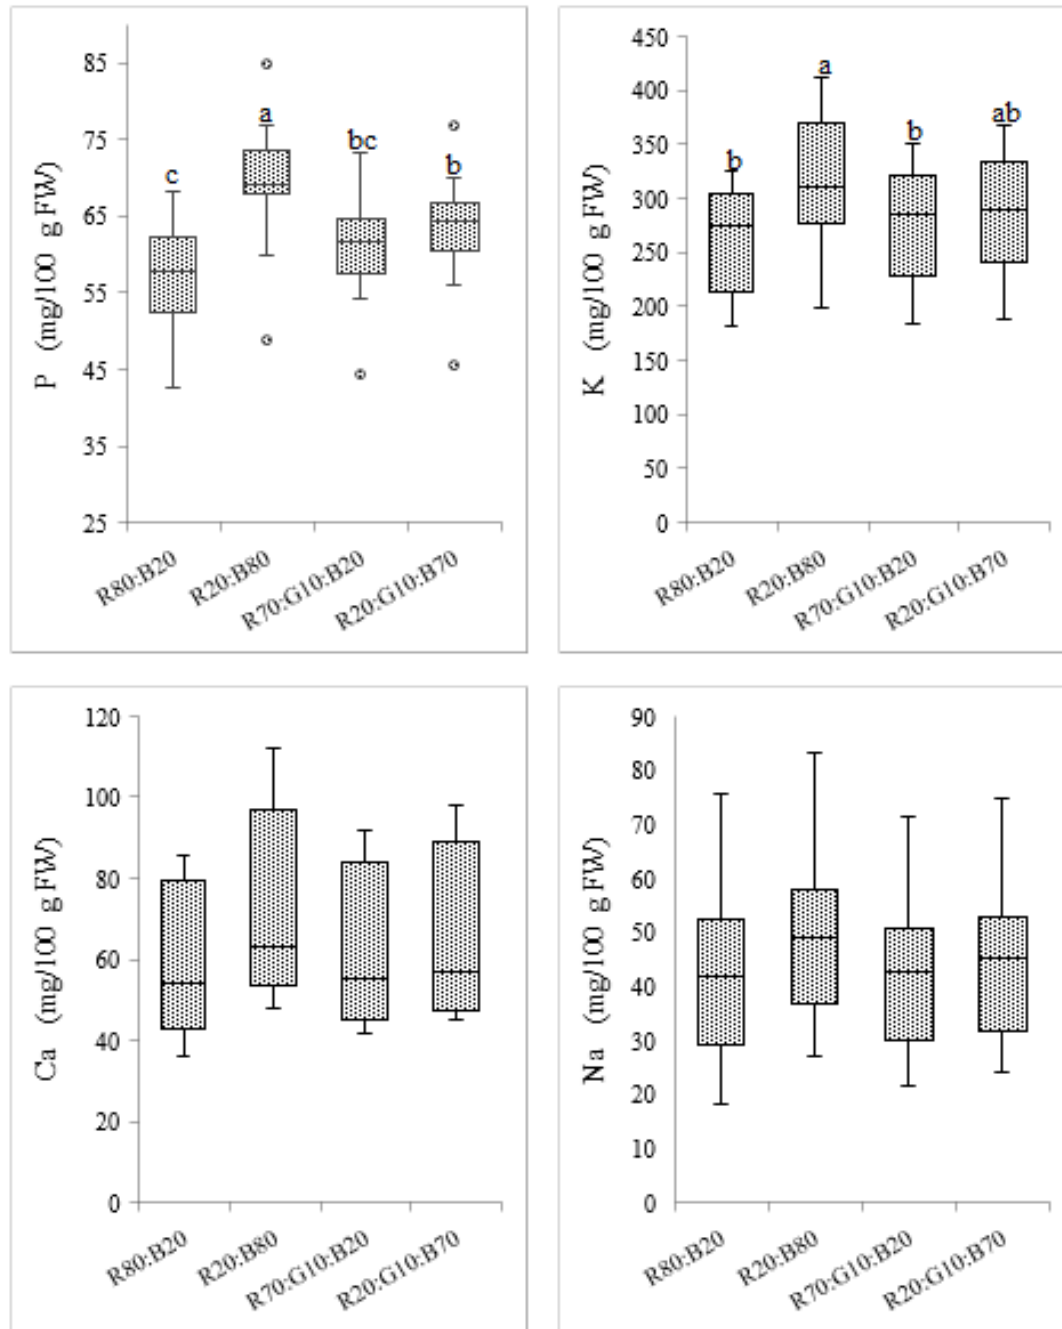

479

480 **Figure 2. Box plot of mineral composition and content of macroelements of *Brassica* microgreens grown under**  
481 **LEDs treatments.** The plot illustrates the Mean and median of macroelements concentrations; P, K, Ca and Na  
482 (mg/100 g FW) of 21 varieties of Brassica microgreens represented 5 species grown under different light-emitting  
483 diodes (LEDs) ratio (%) of red:blue 80:20 (R<sub>80</sub>:B<sub>20</sub>), red:blue 20:80 (R<sub>20</sub>:B<sub>80</sub>), red:green:blue 70:10:20 (R<sub>70</sub>:G<sub>10</sub>:B<sub>20</sub>), or  
484 red:green:blue 20:10:20 (R<sub>20</sub>:G<sub>10</sub>:B<sub>70</sub>) (Supplemental Table 4 and 5) . Resulting ranking could be analyzed with point  
485 values of Mean and Median or uncertainty range with box. Statistical analysis is performed using a one-way ANOVA  
486 test (P ≤ 0.05). Small letters denote statistically significant differences.

487

488

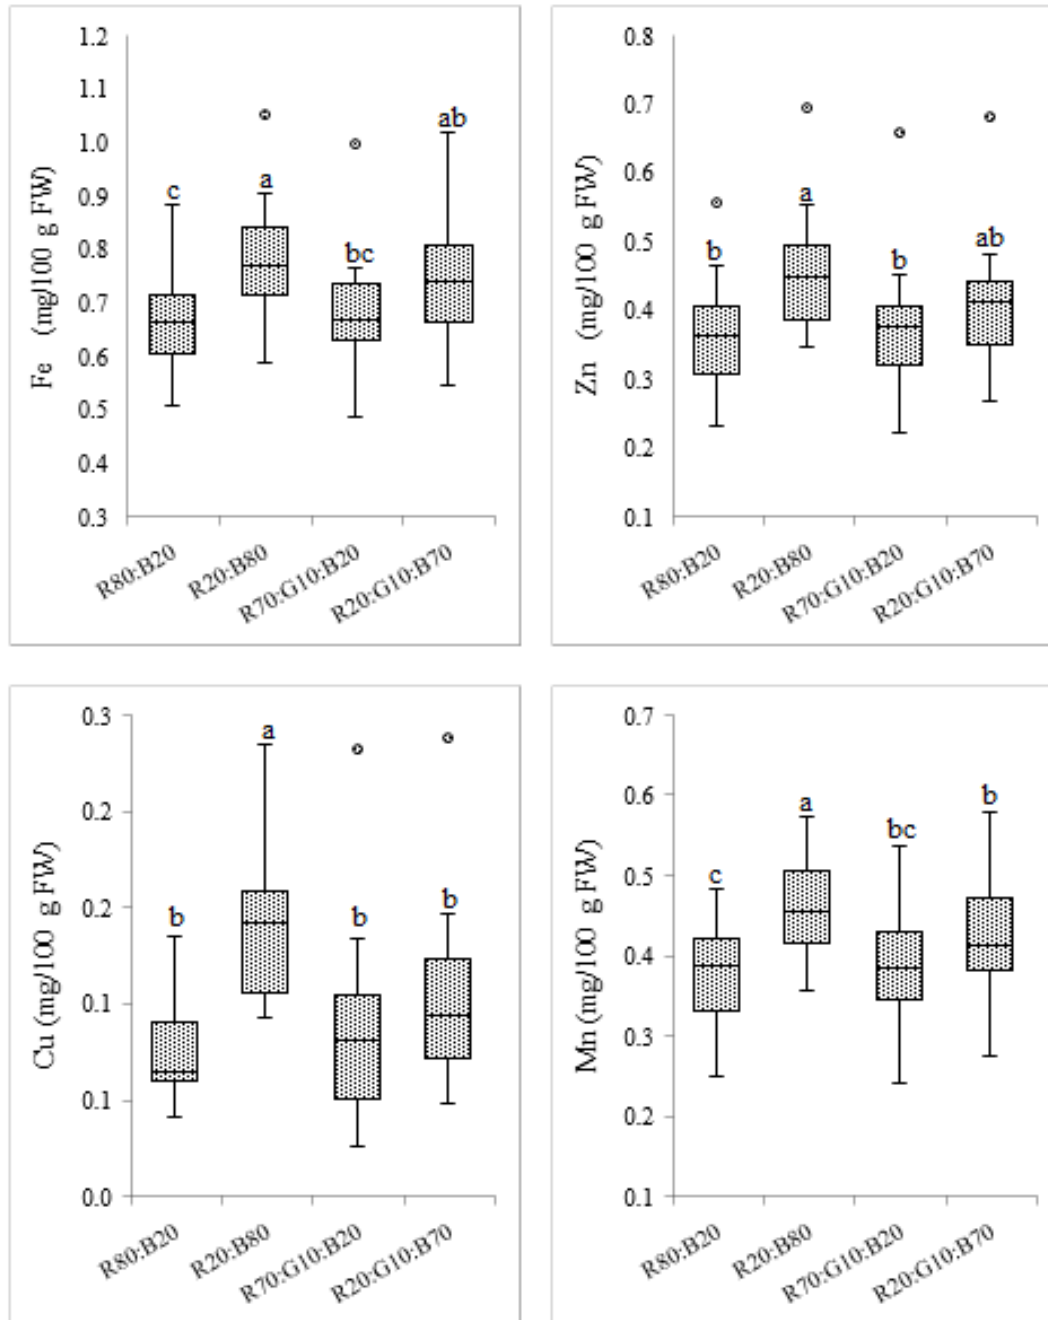

489

490 **Figure 3. Box plot of mineral composition and content of microelements of *Brassica* microgreens grown under**  
491 **LEDs treatments.** The plot illustrates the Mean and median of microelements concentrations; Fe, Zn, Cu and Mn  
492 (mg/100 g FW) of 21 varieties of Brassica microgreens represented 5 species grown under different light-emitting  
493 diodes (LEDs) ratio (%) of red:blue 80:20 (R<sub>80</sub>:B<sub>20</sub>), red:blue 20:80 (R<sub>20</sub>:B<sub>80</sub>), red:green:blue 70:10:20 (R<sub>70</sub>:G<sub>10</sub>:B<sub>20</sub>), or  
494 red:green:blue 20:10:20 (R<sub>20</sub>:G<sub>10</sub>:B<sub>70</sub>) (Supplemental Table 6 and 7) . Resulting ranking could be analyzed with point  
495 values of Mean and Median and uncertainty range with box. Statistical analysis is performed using a one-way ANOVA  
496 test ( $P \leq 0.05$ ). Small letters denote statistically significant differences.

497

498

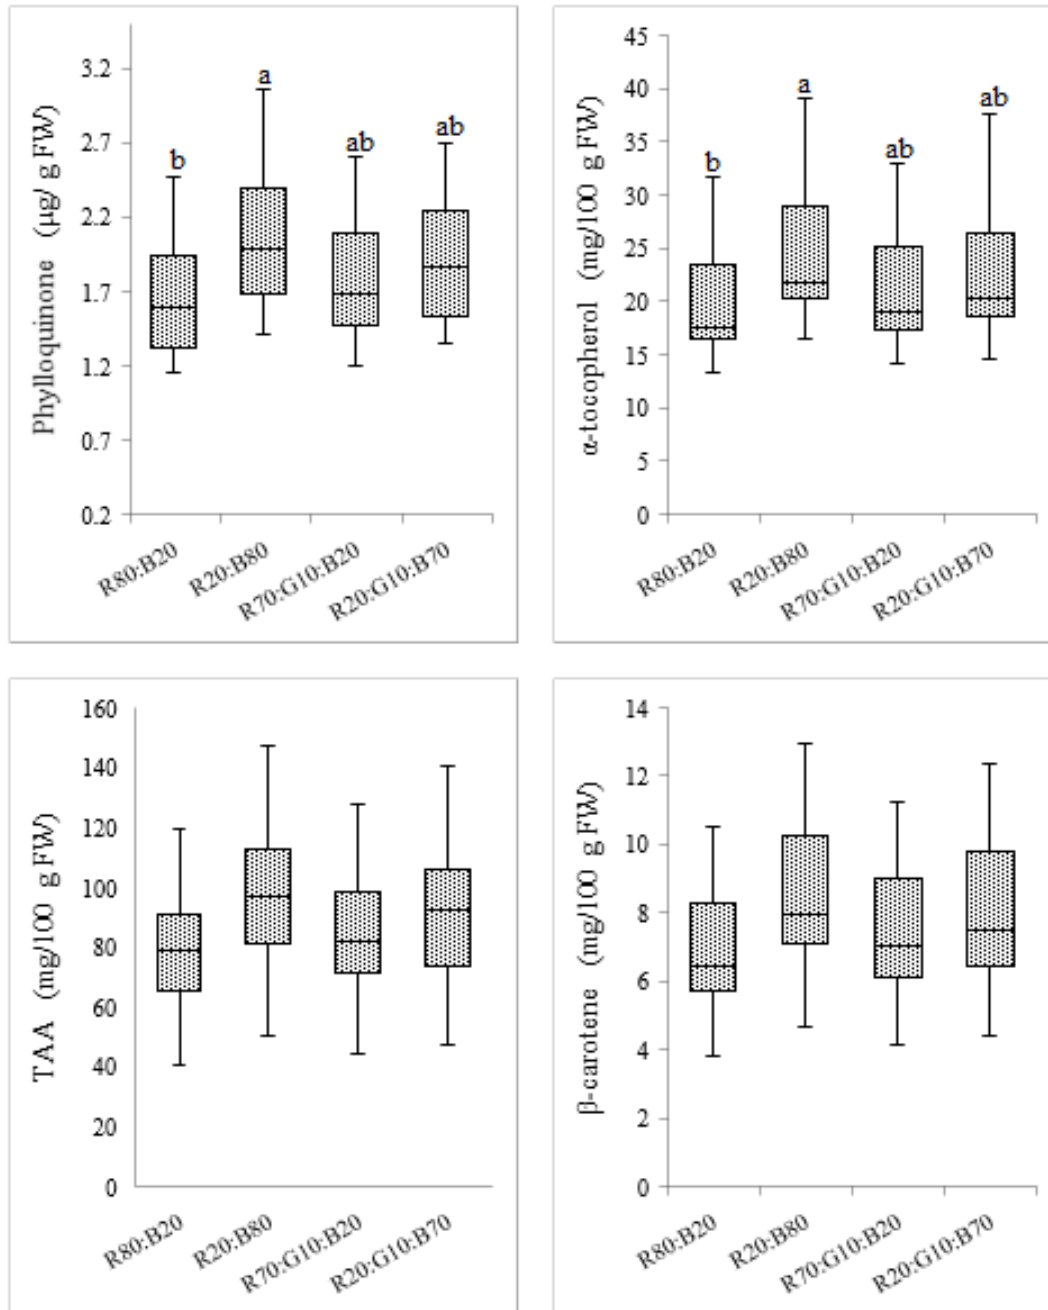

499

500 **Figure 4. Box plot of vitamin and carotenoid concentrations of *Brassica* microgreens grown under LEDs**  
501 **treatments.** The plot illustrates the Mean and median of vitamin and carotenoids concentrations; Phylloquinone (µg/ g  
502 FW), α-tocopherol, Total Ascorbic Acid (TAA), and β-carotene (mg/100 g FW) of 21 varieties of *Brassica* microgreens  
503 represented 5 species grown under different light-emitting diodes (LEDs) ratio (%) of red:blue 80:20 (R<sub>80</sub>:B<sub>20</sub>), red:blue  
504 20:80 (R<sub>20</sub>:B<sub>80</sub>), red:green:blue 70:10:20 (R<sub>70</sub>:G<sub>10</sub>:B<sub>20</sub>), or red:green:blue 20:10:20 (R<sub>20</sub>:G<sub>10</sub>:B<sub>70</sub>) (Supplemental Table 8  
505 and 9) . Resulting ranking could be analyzed with point values of Mean and Median or uncertainty range with box.  
506 Statistical analysis is performed using a one-way ANOVA test ( $P \leq 0.05$ ). Small letters denote statistically significant  
507 differences.

508

509

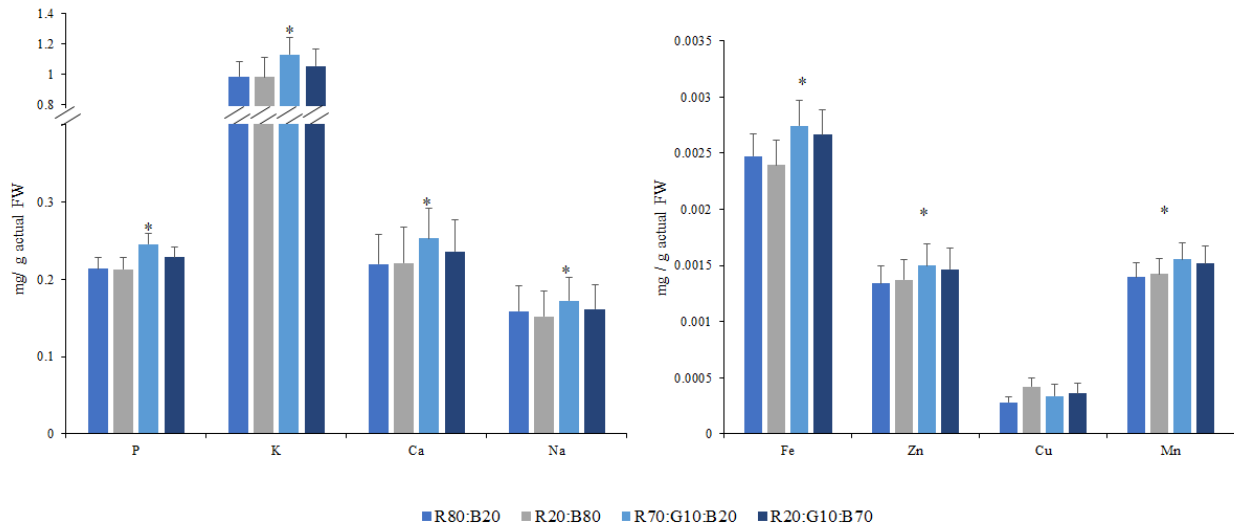

510

511 **Figure 5. Mineral composition and content of *Brassica* microgreens under LEDs treatments.** A) Mean  
 512 macroelement concentration of P, K, Ca, and Na. B) Mean microelement concentration of Fe, Zn, Cu, and Mn of 21  
 513 varieties of *Brassica* microgreens exposed to different light-emitting diodes (LEDs) ratio (%) of red:blue 80:20 (R<sub>80</sub>:B<sub>20</sub>),  
 514 red:blue 20:80 (R<sub>20</sub>:B<sub>80</sub>), red:green:blue 70:10:20 (R<sub>70</sub>:G<sub>10</sub>:B<sub>20</sub>), or red:green:blue 20:10:20 (R<sub>20</sub>:G<sub>10</sub>:B<sub>70</sub>). Data  
 515 represents as a mean concentration corresponding to the actual Fresh weight (fresh weight results of each LEDs  
 516 treatments of the 21 varieties (Supplementary Table 3) (Actual concentration (mg/ g actual FW) = Concentration (mg/  
 517 100 g FW) X Fresh weight (g) / 100). Mean±SE values are based on a representative sample from each treatment across  
 518 three experimental replications. \* for significant at P ≤ 0.05.

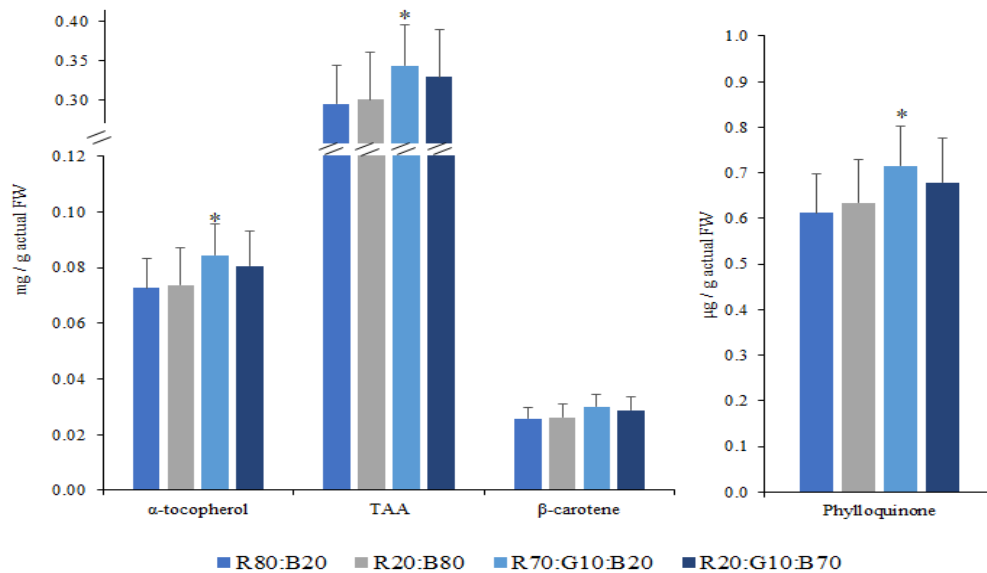

519

520 **Figure 6. Assessment of vitamin and carotenoid concentrations of *Brassica* microgreens under LEDs treatments.** A) Mean  
 521 α-tocopherol, Total Ascorbic Acid (TAA), and β-carotene (mg/100 g FW) concentration. B) Mean  
 522 Phylloquinone (μg/ g FW) concentration of 21 varieties of *Brassica* microgreens exposed to different light-emitting  
 523 diodes (LEDs) ratio (%) of red:blue 80:20 (R<sub>80</sub>:B<sub>20</sub>), red:blue 20:80 (R<sub>20</sub>:B<sub>80</sub>), red:green:blue 70:10:20 (R<sub>70</sub>:G<sub>10</sub>:B<sub>20</sub>), or  
 524 red:green:blue 20:10:20 (R<sub>20</sub>:G<sub>10</sub>:B<sub>70</sub>). Data represents as a mean concentration corresponding to the actual Fresh weight  
 525 (fresh weight results of each LEDs treatments of the 21 varieties (supplementary Table 3) (Actual concentration (mg/ g  
 526 actual FW) = Concentration (mg/ 100 g FW) X Fresh weight (g) / 100). For Phylloquinone ((Actual concentration (mg /  
 527 g actual FW) = Concentration (μg/ g FW) X Fresh weight (g)). Mean±SE values are based on a representative sample  
 528 from each treatment across three experimental replications. \* for significant at P ≤ 0.05.

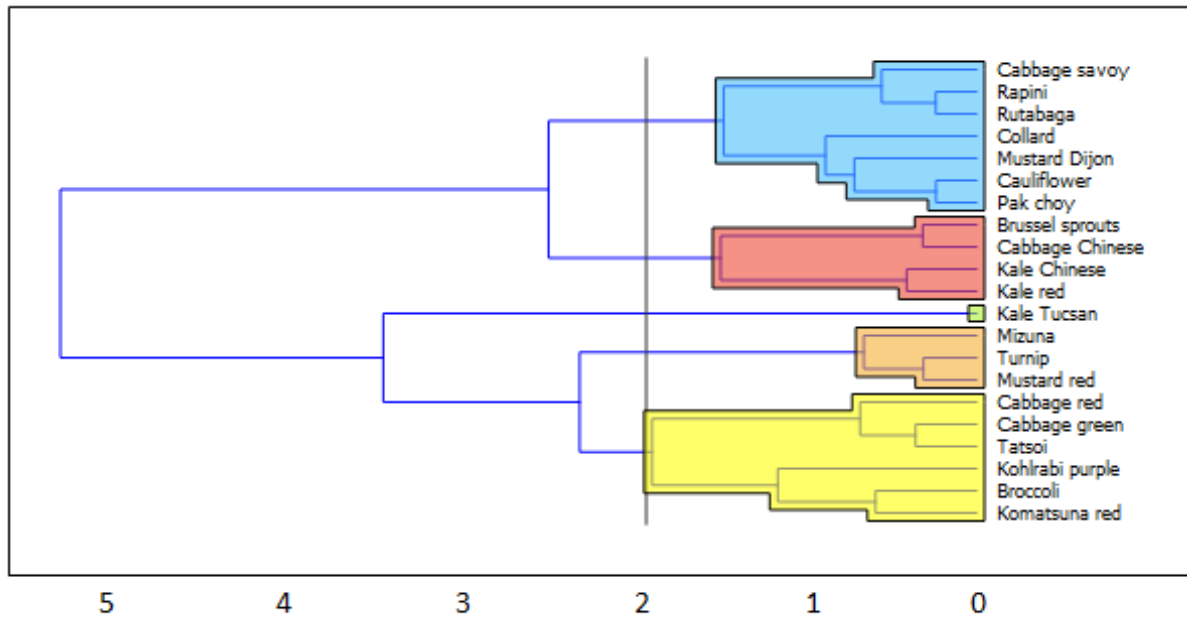

529

530 **Figure 7.** The average-linkage on the normalized data sets of mineral composition and vitamin and carotenoid  
531 concentrations corresponding to the actual fresh weight by means of the Hierarchical method using growth and  
532 morphology measurements data of 21 varieties Brassica microgreens grown under light-emitting diodes (LEDs) ratio  
533 (%) of red:green:blue 70:10:20 ( $R_{70}:G_{10}:B_{20}$ ). The complete profile of the highest cluster value (Yellow cluster)  
534 microgreens presented in Table 2.

535

536

537 **Tables**

538

539 **Table 1.** Twenty-one varieties of Brassica microgreens represented 5 species Brassica genera  
540 assayed in this study. Growth length (day) and seed index (g) show each variety growth period and  
541 the number of seeds used for the sowing.

542

| Commercial name | Scientific name (genus and species)                                | Growth length (day) | Seed index (g) |
|-----------------|--------------------------------------------------------------------|---------------------|----------------|
| Broccoli        | <i>Brassica oleracea</i> L. var. <i>italica</i>                    | 9                   | 10             |
| Brussel sprouts | <i>Brassica oleracea</i> L. var. <i>Gemmifera</i>                  | 10                  | 15             |
| Cabbage green   | <i>Brassica oleracea</i> L. var. <i>capitata</i> f. <i>alba</i>    | 9                   | 10             |
| Cabbage red     | <i>Brassica oleracea</i> L. var. <i>capitata</i> f. <i>rubra</i>   | 8                   | 10             |
| Cabbage savoy   | <i>Brassica oleracea</i> L. var. <i>capitata</i> f. <i>sabauda</i> | 8                   | 10             |
| Cauliflower     | <i>Brassica oleracea</i> L. var. <i>botrytis</i>                   | 9                   | 15             |
| Collard         | <i>Brassica oleracea</i> L. var. <i>viridis</i>                    | 10                  | 15             |
| Kale Chinese    | <i>Brassica oleracea</i> L. var. <i>alboglabra</i>                 | 10                  | 15             |
| Kale red        | <i>Brassica oleracea</i> L. var. <i>acephala</i>                   | 9                   | 10             |
| Kale Tucsan     | <i>Brassica oleracea</i> L. var. <i>acephala</i>                   | 9                   | 15             |
| Kohlrabi purple | <i>Brassica oleracea</i> L. var. <i>gongylodes</i>                 | 7                   | 25             |
| Cabbage Chinese | <i>Brassica rapa</i> L. var. <i>pekinensis</i>                     | 6                   | 15             |
| Komatsuna red   | <i>Brassica rapa</i> L. var. <i>perviridis</i>                     | 8                   | 15             |
| Mizuna          | <i>Brassica rapa</i> L. var. <i>nipposinica</i>                    | 8                   | 15             |
| Pak choy        | <i>Brassica rapa</i> L. var. <i>chinensis</i>                      | 8                   | 15             |
| Rapini          | <i>Brassica rapa</i> L. var. <i>ruvo</i>                           | 9                   | 15             |
| Turnip          | <i>Brassica rapa</i> L. var. <i>rapa</i>                           | 9                   | 10             |
| Mustard Dijon   | <i>Brassica juncea</i> (L.) Czern.                                 | 12                  | 15             |
| Mustard red     | <i>Brassica juncea</i> (L.) Czern.                                 | 10                  | 10             |
| Rutabaga        | <i>Brassica napus</i> L. var. <i>napobrassica</i>                  | 9                   | 10             |
| Tatsoi          | <i>Brassica narinosa</i> L. var. <i>rosularis</i>                  | 7                   | 10             |

543

544



545 **Table 2.** Growth, and nutritional composition profile of highest Brassica microgreens grown under  
546 light-emitting diodes (LEDs) ratio (%) of red:green:blue 70:10:20 (R<sub>70</sub>:G<sub>10</sub>:B<sub>20</sub>). List of the 7  
547 brassica microgreens is exported from the hierarchical cluster analysis (Figure 7).

548

549

|                                      | <b>Kohlrabi<br/>purple</b> | <b>Cabbage<br/>red</b> | <b>Broccoli</b> | <b>Kale<br/>Tucson</b> | <b>Komatsuna<br/>red</b> | <b>Tatsoi</b> | <b>Cabbage<br/>green</b> |
|--------------------------------------|----------------------------|------------------------|-----------------|------------------------|--------------------------|---------------|--------------------------|
| Hypocotyl Length (mm)                | 46                         | 47                     | 42              | 49                     | 44                       | 46            | 45                       |
| Leaf Area (cm <sup>2</sup> )         | 1.82                       | 1.93                   | 1.65            | 2.02                   | 1.75                     | 1.86          | 1.83                     |
| Fresh weight (g)                     | 0.44                       | 0.46                   | 0.42            | 0.47                   | 0.41                     | 0.45          | 0.44                     |
| Dry weight (%)                       | 6.65                       | 6.18                   | 6.55            | 6.90                   | 6.57                     | 6.34          | 6.25                     |
| P (mg/100 g FW)                      | 68                         | 62                     | 59              | 63                     | 66                       | 64            | 62                       |
| K (mg/100 g FW)                      | 322                        | 224                    | 319             | 280                    | 320                      | 300           | 183                      |
| Ca (mg/100 g FW)                     | 65                         | 84                     | 92              | 55                     | 53                       | 44            | 87                       |
| Na (mg/100 g FW)                     | 46                         | 40                     | 50              | 46                     | 28                       | 35            | 69                       |
| Fe (mg/100 g FW)                     | 0.77                       | 0.69                   | 0.74            | 0.76                   | 0.76                     | 0.65          | 0.67                     |
| Zn (mg/100 g FW)                     | 0.43                       | 0.40                   | 0.42            | 0.38                   | 0.38                     | 0.41          | 0.33                     |
| Cu (mg/100 g FW)                     | 0.08                       | 0.10                   | 0.11            | 0.07                   | 0.05                     | 0.08          | 0.06                     |
| Mn (mg/100 g FW)                     | 0.39                       | 0.35                   | 0.41            | 0.46                   | 0.34                     | 0.35          | 0.37                     |
| Phylloquinone<br>(ug/ g FW)          | 2.6                        | 2.3                    | 2.0             | 1.7                    | 2.2                      | 1.5           | 1.4                      |
| α-tocopherol<br>(mg/100 g FW)        | 17.6                       | 29.5                   | 17.3            | 19.4                   | 25.0                     | 29.3          | 14.3                     |
| Total Ascorbic Acid<br>(mg/100 g FW) | 77.1                       | 127.4                  | 84.6            | 73.2                   | 97.5                     | 99.5          | 118.9                    |
| β-carotene<br>(mg/100 g FW)          | 6.6                        | 9.9                    | 6.9             | 5.4                    | 7.1                      | 10.6          | 9.6                      |

550

551

552

553

554
